# Supplementary material for: Knowledge and attitudes of Implementation Support Practitioners—Findings from a systematic integrative review
Source: PubMed Central journal article supplement (PMC9094539; doi:10.1371/journal.pone.0267533), 2022-05-11
Supplement: pone.0267533.s004.pdf [file pone.0267533.s004.pdf]

**S4 Appendix:** Overview of descriptors identified in the included studies categorized in the five knowledge themes (*clinical practice knowledge, implementation / improvement practice knowledge, knowledge about the local context, knowledge about supporting change processes, knowledge about facilitating evidence-based practice in general*). The publication IDs indicate the corresponding articles in which the descriptors were identified.

| <b>Clinical practice</b><br><i>ISPs have knowledge about...</i>                       | <b>Publication references</b>                                                                                                                                                                     | <b>Number of publications</b> |
|---------------------------------------------------------------------------------------|---------------------------------------------------------------------------------------------------------------------------------------------------------------------------------------------------|-------------------------------|
| <i>the intervention and its target population</i>                                     | [48] [49] [54] [55] [57] [59] [60] [61] [64] [65] [66] [67] [68] [70] [72] [73] [75] [79] [95] [96] [97] [99] [102] [103] [104] [106] [108] [109] [110] [111] [117] [119] [120] [122] [123] [124] | n = 36                        |
| <i>the research in the clinical area</i>                                              | [47] [48] [50] [51] [57] [66] [68] [69] [70] [71] [74] [95] [98] [103] [104] [105] [106] [109] [121] [122]                                                                                        | n = 20                        |
| <i>the field (being clinically experienced and not a novice)</i>                      | [66] [78] [99] [106] [109] [110] [122]                                                                                                                                                            | n = 7                         |
| <i>how to assess the needs of a target population and support intervention design</i> | [50] [57] [101]                                                                                                                                                                                   | n = 3                         |
| <i>how to administer clinical tools</i>                                               | [116] [117]                                                                                                                                                                                       | n = 2                         |
| <i>the principles of sector administration</i>                                        | [118]                                                                                                                                                                                             | n = 1                         |

| <b>Implementation / improvement practice</b><br><i>ISPs have knowledge about...</i> | <b>Publication IDs</b>                                                       | <b>Number of publications</b> |
|-------------------------------------------------------------------------------------|------------------------------------------------------------------------------|-------------------------------|
| specific improvement / implementation methods / approaches                          | [54] [57] [62] [68] [69] [80] [97] [109] [113] [115] [116] [117] [118] [123] | n = 14                        |
| the principles of high-quality implementation                                       | [50] [59] [101] [118]                                                        | n = 4                         |
| the principles of high-quality                                                      | [66] [75] [104] [106]                                                        | n = 4                         |

|                                                                                       |                        |       |
|---------------------------------------------------------------------------------------|------------------------|-------|
| facilitation                                                                          |                        |       |
| one's own role as an implementation support practitioner                              | [77] [107] [116] [120] | n = 4 |
| how to guide implementation through appropriate educational materials                 | [49] [96]              | n = 2 |
| an intervention's implementation model / standards and how to maintain these          | [95] [96]              | n = 2 |
| how to collect and utilize data for intervention design and implementation            | [50] [101]             | n = 2 |
| how to assess fidelity                                                                | [53] [63]              | n = 2 |
| how to model and simulate change                                                      | [103] [106]            | n = 2 |
| implementation strategies                                                             | [56] [66]              | n = 2 |
| how to select and apply implementation strategies                                     | [98] [104]             | n = 2 |
| how to support program adaptation                                                     | [57] [59]              | n = 2 |
| particular coaching models                                                            | [96]                   | n = 1 |
| coaching models and techniques                                                        | [119]                  | n = 1 |
| how to develop responses to changes in the implementation process                     | [95]                   | n = 1 |
| how to assess implementation barriers and plan their removal                          | [95]                   | n = 1 |
| how to teach ways to assess fidelity and how to enhance reliable fidelity measurement | [53]                   | n = 1 |
| how to read and interpret                                                             | [53]                   | n = 1 |

|                                                                                |       |       |
|--------------------------------------------------------------------------------|-------|-------|
| fidelity data                                                                  |       |       |
| how to provide feedback                                                        | [103] | n = 1 |
| principles of high-quality coaching                                            | [103] | n = 1 |
| specific consultation interventions                                            | [66]  | n = 1 |
| how to make training active                                                    | [111] | n = 1 |
| how to provide performance feedback                                            | [63]  | n = 1 |
| principles of high-quality consultation                                        | [79]  | n = 1 |
| how to assess workflows                                                        | [71]  | n = 1 |
| one's own implementation approach                                              | [48]  | n = 1 |
| how to evaluate                                                                | [117] | n = 1 |
| how to increase demand                                                         | [75]  | n = 1 |
| how to support program sustainability                                          | [57]  | n = 1 |
| typical implementation barriers related to EBP implementation                  | [57]  | n = 1 |
| tools that can support implementation processes (planning templates, measures) | [57]  | n = 1 |
| how to collect data                                                            | [70]  | n = 1 |
| the principles of high-quality evaluation                                      | [114] | n = 1 |
| implementation science                                                         | [118] | n = 1 |

| <b>The local context</b>            | <b>Publication IDs</b>                       | <b>Number of publications</b> |
|-------------------------------------|----------------------------------------------|-------------------------------|
| <i>ISPs have knowledge about...</i> |                                              |                               |
| organizational structures and       | [57] [78] [95] [107] [108] [109] [115] [121] | n = 9                         |

|                                                                                    |                                 |       |
|------------------------------------------------------------------------------------|---------------------------------|-------|
| sensitivities                                                                      | [125]                           |       |
| local conditions                                                                   | [58] [66] [69] [71] [119] [122] | n = 6 |
| the local service system                                                           | [120] [122] [125]               | n = 3 |
| systems used                                                                       | [71] [122]                      | n = 2 |
| local practice issues                                                              | [107] [116]                     | n = 2 |
| local policy priorities                                                            | [107] [108]                     | n = 2 |
| how an implementation unfolds locally                                              | [95] [96]                       | n = 2 |
| local funding structures                                                           | [124]                           | n = 1 |
| local performance                                                                  | [122]                           | n = 1 |
| local policies and practices                                                       | [47]                            | n = 1 |
| organizational needs                                                               | [107]                           | n = 1 |
| local constraints                                                                  | [106]                           | n = 1 |
| the outer setting                                                                  | [121]                           | n = 1 |
| hierarchies, influencers                                                           | [52]                            | n = 1 |
| local key players                                                                  | [66]                            | n = 1 |
| how to integrate implementation activities into existing organizational structures | [53]                            | n = 1 |
| the range of organizations in which an intervention is implemented                 | [49]                            | n = 1 |
| parallel implementation initiatives                                                | [95]                            | n = 1 |

| <b>Supporting change processes</b>  | <b>Publication IDs</b>       | <b>Number of publications</b> |
|-------------------------------------|------------------------------|-------------------------------|
| <i>ISPs have knowledge about...</i> |                              |                               |
| how to train                        | [75] [114] [116] [118] [123] | n = 5                         |
| how to effectively communicate      | [66] [98] [100]              | n = 3                         |

|                                                                                                                     |                  |       |
|---------------------------------------------------------------------------------------------------------------------|------------------|-------|
| how to lead / facilitate groups including participation in group processes, decision-making and conflict resolution | [72] [100] [124] | n = 3 |
| how to solve logistical issues                                                                                      | [103] [109]      | n = 2 |
| principles of organizational change                                                                                 | [109] [118]      | n = 2 |
| how to enhance skills required for change                                                                           | [96]             | n = 1 |
| ongoing / planned organizational change processes                                                                   | [95]             | n = 1 |
| how to plan and prepare                                                                                             | [60]             | n = 1 |
| how to organize (e.g. meetings, collaborative processes)                                                            | [100]            | n = 1 |
| how to manage time                                                                                                  | [98]             | n = 1 |
| small group learning approaches                                                                                     | [56]             | n = 1 |
| how to lead processes                                                                                               | [106]            | n = 1 |
| the principles of organizational / individual behavior change and how to maintain such change                       | [47]             | n = 1 |
| tools and the practice of change processes                                                                          | [47]             | n = 1 |
| principles of high-quality project management                                                                       | [120]            | n = 1 |
| principles of organizational and/or leadership development, and organizational strategic planning                   | [57]             | n = 1 |
| the principles of professional development                                                                          | [118]            | n = 1 |

| <b>Facilitating EBP in general</b> | <b>Publication IDs</b> | <b>Number of publications</b> |
|------------------------------------|------------------------|-------------------------------|
|------------------------------------|------------------------|-------------------------------|

| <i>ISPs have knowledge about...</i>         |                             |       |
|---------------------------------------------|-----------------------------|-------|
| what characterizes (good) research          | [56] [64] [101] [105] [106] | n = 5 |
| the key principles of EBP                   | [94] [106] [107]            | n = 3 |
| knowledge translation                       | [48] [51] [98]              | n = 3 |
| general principles of high-quality practice | [50] [74] [121]             | n = 3 |
| how to source evidence                      | [101] [105] [106]           | n = 3 |
| how to conduct an evaluation                | [57] [104]                  | n = 2 |
| evidence synthesis                          | [56]                        | n = 1 |
| how to select an RSI                        | [59]                        | n = 1 |
