# Supplementary material for: Knowledge and attitudes of Implementation Support Practitioners—Findings from a systematic integrative review
Source: PubMed Central journal article supplement (PMC9094539; doi:10.1371/journal.pone.0267533), 2022-05-11
Supplement: pone.0267533.s005.pdf [file pone.0267533.s005.pdf]

**S5 Appendix:** Overview of descriptors identified in the included studies categorized in the seven attitude themes (*professional, motivated / motivating / encouraging / empowering attitude, empathetic / respectful / sensitive attitude, collaborative / inclusive attitude, authentic attitude, creative / flexible / innovative / adaptive attitude, frank / direct / honest attitude*). The publication IDs indicate the corresponding articles in which the descriptors were identified.

| <b>Attitudes</b>                 | <b>Publication references</b>                                        | <b>Number of Publications</b> |
|----------------------------------|----------------------------------------------------------------------|-------------------------------|
| <i>ISPs have a ... attitude.</i> |                                                                      |                               |
| <b>Professional</b>              |                                                                      | <b>N = 28</b>                 |
| <i>Professional*</i>             | [82] [92] [100] [108]                                                | n = 4                         |
| Responsive                       | [84] [85] [86] [91] [95] [99] [100] [108]<br>[114] [118] [119] [123] | n = 12                        |
| Focused                          | [85] [89] [90] [100] [108] [113] [121]<br>[122] [125]                | n = 9                         |
| Credible                         | [91] [93] [99] [101] [106] [119] [121]                               | n = 7                         |
| Resilient                        | [84] [101] [106] [110] [113] [121]                                   | n = 6                         |
| Perseverant                      | [101] [113] [121]                                                    | n = 3                         |
| Clear                            | [108] [115] [118]                                                    | n = 3                         |
| Research-minded                  | [98] [106]                                                           | n = 2                         |
| Persistent                       | [100] [110]                                                          | n = 2                         |
| Consistent                       | [103] [119]                                                          | n = 2                         |
| Proactive                        | [84]                                                                 | n = 1                         |
| Autonomous                       | [84]                                                                 | n = 1                         |
| Neutral                          | [84]                                                                 | n = 1                         |
| Accurate                         | [103]                                                                | n = 1                         |
| Self-efficient                   | [111]                                                                | n = 1                         |
| Committed                        | [113]                                                                | n = 1                         |
| Patient                          | [92]                                                                 | n = 1                         |
| Timely                           | [119]                                                                | n = 1                         |
| Discrete                         | [119]                                                                | n = 1                         |

|                                                           |                                                                                                                                               |               |
|-----------------------------------------------------------|-----------------------------------------------------------------------------------------------------------------------------------------------|---------------|
| Reliable/dependable                                       | [121]                                                                                                                                         | n = 1         |
| Intentional                                               | [123]                                                                                                                                         | n = 1         |
| Accountable                                               | [125]                                                                                                                                         | n = 1         |
| <b>Motivated / motivating / encouraging / empowering</b>  |                                                                                                                                               | <b>N = 25</b> |
| <i>Motivated / motivating / encouraging / empowering*</i> | [83] [85] [87] [89] [92] [94] [97] [99] [100] [101] [102] [103] [104] [106] [107] [108] [111] [113] [116] [118] [119] [120] [121] [122] [123] | n = 25        |
| <b>Empathetic / respectful / sensitive</b>                |                                                                                                                                               | <b>N = 20</b> |
| <i>Empathetic / respectful / sensitive*</i>               | [82] [85] [87] [90] [92] [95] [100] [101] [104] [106] [108] [110] [112] [118] [119] [120] [122] [123] [124] [125]                             | n = 20        |
| <b>Collaborative / inclusive</b>                          |                                                                                                                                               | <b>N = 19</b> |
| <i>Collaborative / inclusive*</i>                         | [85] [92] [94] [95] [96] [97] [98] [100] [101] [106] [108] [111] [112] [117] [118] [119] [123] [124] [125]                                    | n = 19        |
| <b>Authentic</b>                                          |                                                                                                                                               | <b>N = 13</b> |
| <i>Authentic*</i>                                         | [81] [85] [95] [96] [98] [105] [108] [109] [113] [115] [119] [123]                                                                            | n = 12        |
| Self-aware                                                | [121]                                                                                                                                         | n = 1         |
| <b>Creative / flexible / innovative / adaptive</b>        |                                                                                                                                               | <b>N = 9</b>  |
| <i>Creative / flexible / innovative / adaptive*</i>       | [86] [88] [98] [101] [106] [111] [115] [116] [117]                                                                                            | n = 9         |
| <b>Frank / direct / honest</b>                            |                                                                                                                                               | <b>N = 5</b>  |
| <i>Frank / honest / direct*</i>                           | [81] [92] [113] [118] [122]                                                                                                                   | n = 5         |

\* not further specified
